# Supplementary material for: KDM5 demethylases suppress R-loop-mediated ‘viral mimicry’ and DNA damage in breast cancer cells
Source: eLife. 2025 Oct 13;14:RP106249. doi: 10.7554/eLife.106249 (PMC12517688; doi:10.7554/eLife.106249)
Supplement: Supplementary file 1. [file elife-106249-supp1.xlsx]

## Sheet: Sheet1
IFN_signature	AP_signature
ADAR	B2M
B2M	CALR
BST2	CANX
CIITA	ERAP1
EIF2AK2	ERAP2
GBP2	HLA-A
GBP4	HLA-B
GBP6	HLA-C
HLA-A	IFI30
HLA-B	LNPEP
HLA-C	PDIA3
HLA-G	PSMB8
IFI27	SAR1B
IFI30	TAP1
IFI35	TAP2
IFIT1	TAPBP
IFIT2
IFIT3
IFITM1
IFITM2
IFITM3
IFNAR1
IFNAR2
IFNB1
IRF1
IRF2
IRF3
IRF4
IRF5
IRF7
IRF8
IRF9
ISG15
ISG20
JAK1
JAK2
MX1
MX2
OAS1
OAS2
OAS3
OASL
PSMB8
PTPN1
PTPN11
PTPN2
PTPN6
RSAD2
SAMHD1
SOCS1
SOCS3
SP100
STAT1
STAT2
TRIM14
TRIM21
TRIM25
TRIM26
TRIM6
TYK2
USP18
XAF1
